# Supplementary material for: Synergistic effect of the anti-solvent bath method and improved annealing conditions for high-quality triple cation perovskite thin films
Source: Royal Society of Chemistry journal article supplement (doi:10.1039/d0ra02719g), 2020-01-01
Supplement: d0ra02719g1.pdf [file d0ra02719g1.pdf]

# Supporting Information

## Synergistic Effect of Anti-Solvent Bath Method and Optimized Annealing Conditions to Spawn High Quality Triple Cation Thin Films

Geoffrey Ryan Adams <sup>a</sup>, Vincent Obiozo Eze <sup>a</sup>, Lucas Carani <sup>a</sup>, Aaron Pino <sup>a</sup>, Claire Jolowsky <sup>a</sup> and Okenwa I. Okoli <sup>\*a</sup>

Table S1: Table of triple cation perovskite solution values and weights

|             |                                         |       |       |       |      |  |
|-------------|-----------------------------------------|-------|-------|-------|------|--|
| <b>1</b>    | Cs(0.05)FA(0.79)MA(0.16)PbI(2.7)Br(0.3) |       |       |       |      |  |
| Material    | Cs                                      | FAI   | MAI   | PbI   | PbBr |  |
| Weight (mg) | 19                                      | 300.2 | 60.8  | 826.2 | 91.8 |  |
| <b>2</b>    | Cs(0.05)FA(0.67)MA(0.28)PbI(2.7)Br(0.3) |       |       |       |      |  |
| Material    | Cs                                      | FAI   | MAI   | PbI   | PbBr |  |
| Weight (mg) | 19                                      | 254.6 | 106.4 | 826.2 | 91.8 |  |
| <b>3</b>    | Cs(0.05)FA(0.55)MA(0.40)PbI(2.7)Br(0.3) |       |       |       |      |  |
| Material    | Cs                                      | FAI   | MAI   | PbI   | PbBr |  |
| Weight (mg) | 19                                      | 209   | 152   | 826.2 | 91.8 |  |
| <b>4</b>    | Cs(0.05)FA(0.40)MA(0.55)PbI(2.7)Br(0.3) |       |       |       |      |  |
| Material    | Cs                                      | FAI   | MAI   | PbI   | PbBr |  |
| Weight (mg) | 19                                      | 152   | 209   | 826.2 | 91.8 |  |
| <b>5</b>    | Cs(0.05)FA(0.28)MA(0.67)PbI(2.7)Br(0.3) |       |       |       |      |  |
| Material    | Cs                                      | FAI   | MAI   | PbI   | PbBr |  |
| Weight (mg) | 19                                      | 106.4 | 254.6 | 826.2 | 91.8 |  |
| <b>6</b>    | Cs(0.05)FA(0.16)MA(0.79)PbI(2.7)Br(0.3) |       |       |       |      |  |
| Material    | Cs                                      | FAI   | MAI   | PbI   | PbBr |  |
| Weight (mg) | 19                                      | 60.8  | 300.2 | 826.2 | 91.8 |  |

<sup>a</sup> High Performance Materials Institute, FAMU-FSU College of Engineering, Tallahassee, FL 32310

\* Corresponding Author email: ookoli@fsu.edu

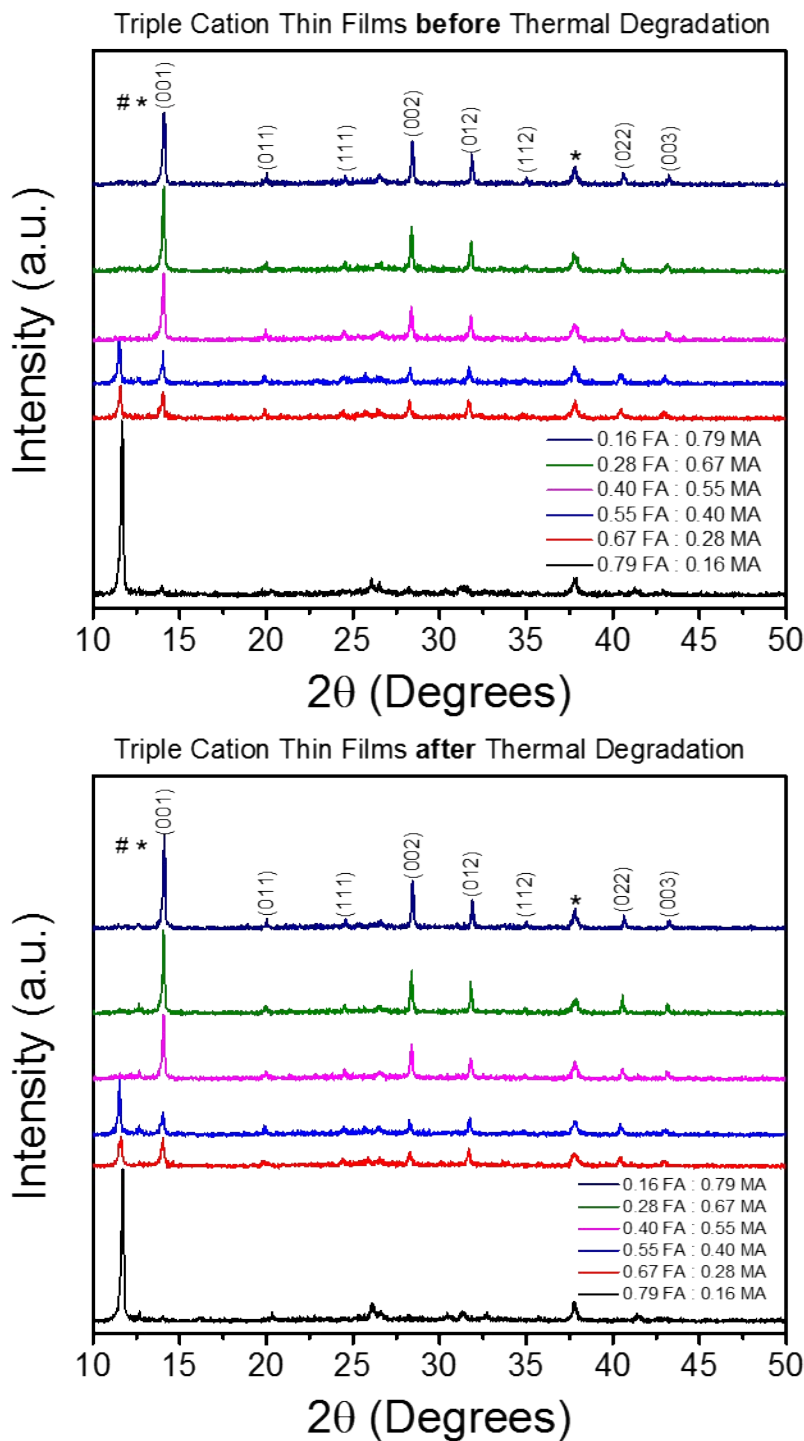

Figure S1: Full XRD spectra for FAVsMA triple cation perovskite. The symbols ‘#’ and ‘\*’ represent  $\delta$ -phase perovskite and cubic  $\text{PbI}_2$ , respectively. Peaks were indexed via literature [1].

Table S2: Summary of FWHM and crystallite size for the FA;MA triple cation perovskite thin films - based off the XRD results in Figure 1 and Equation 1

| Sample            | Before Heat<br>FWHM (degree) | After Heat<br>FWHM (degree) |
|-------------------|------------------------------|-----------------------------|
| 0.79 FA : 0.16 MA | 1.03                         | 1.1704                      |
| 0.67 FA : 0.28 MA | 0.1993                       | 0.205                       |
| 0.55 FA : 0.40 MA | 0.1384                       | 0.2613                      |
| 0.40 FA : 0.55 MA | 0.1645                       | 0.1417                      |
| 0.28 FA : 0.67 MA | 0.1690                       | 0.1159                      |
| 0.16 FA : 0.79 MA | 0.1672                       | 0.1399                      |

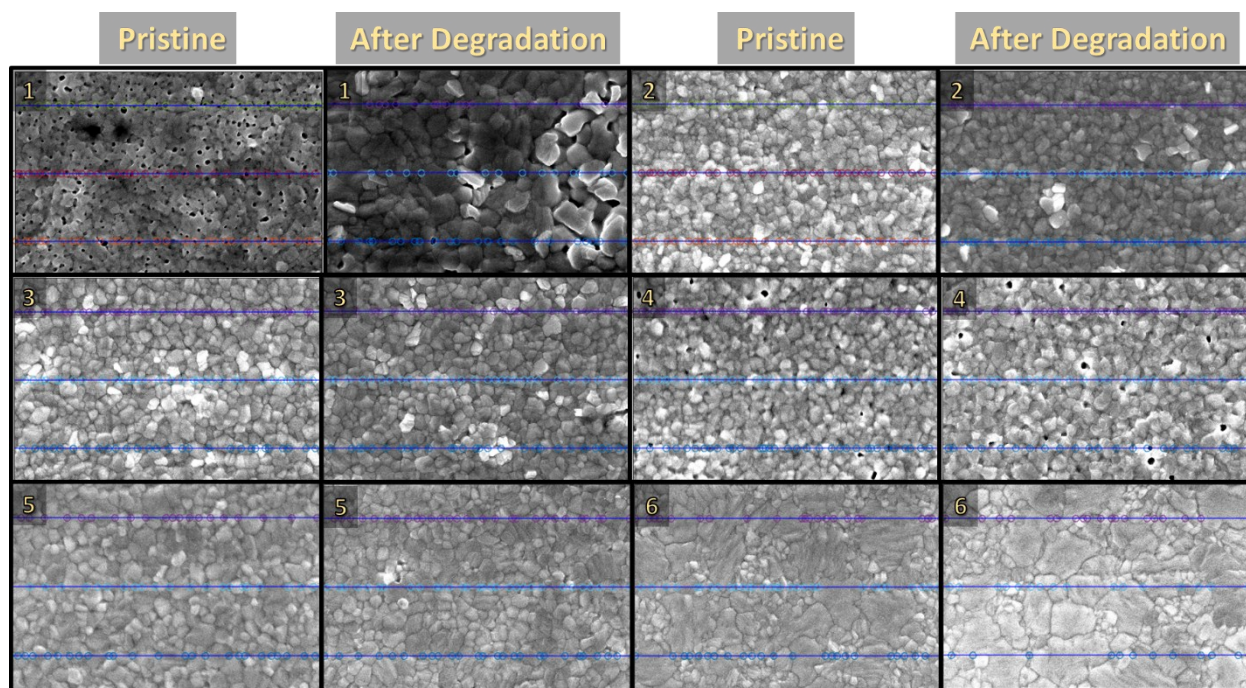

Figure S2: SEM images all at 30,000x magnification of FAVsMA triple cation perovskite thin films before and after thermal degradation on hotplate at 85° C for 2 hours. The lines across the images with circles are from the Matlab program used to calculate grain size. Program is open source available on MathWorks written by Matthias Funk from the Karlsruhe Institute of Technology. The numbering scheme coordinates with the numbers found in Table S1, for the solution amounts of FAVsMA - with 1 being FA rich and 6 being MA rich.

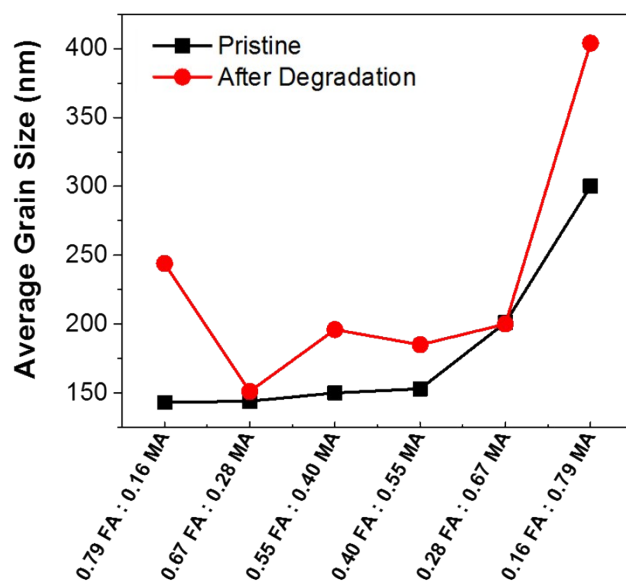

Figure S3: Calculated mean for grain size of films before and after heating. Mean calculated from open source program available on MathWorks written by Matthias Funk from the Karlsruhe Institute of Technology.

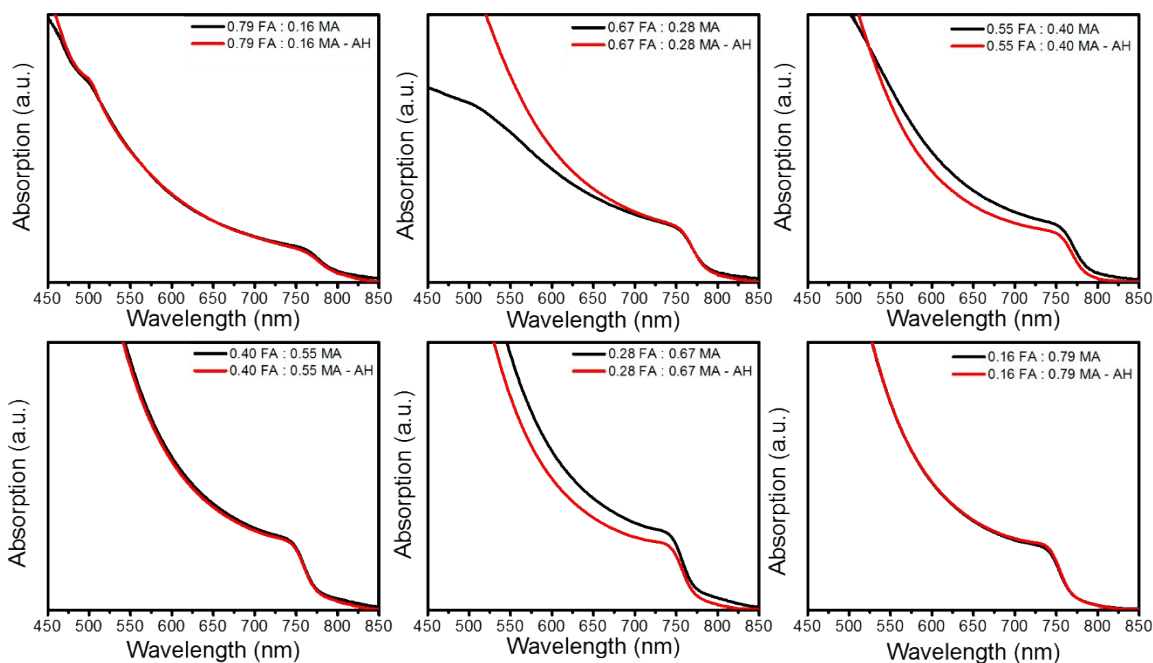

Figure S4: UV-vis measurements of FAVsMA films both before and after thermal degradation on hotplate. The 'AH' in the plot legend stands for 'after heat', denoting that measurement as the one after hotplate degradation. Slight increase in absorption was observed for the MA rich perovskite film (0.16 FA:0.79 MA).

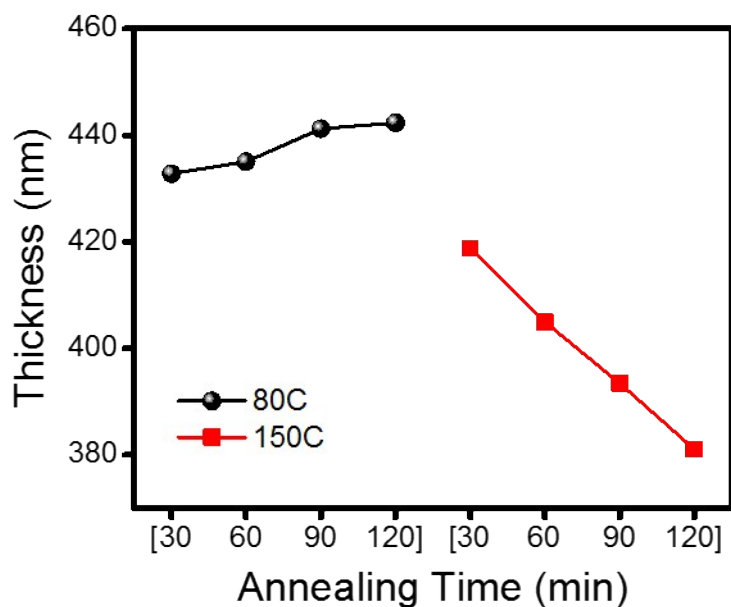

Figure S5: Thickness of  $\text{Cs}_{0.05}\text{FA}_{0.16}\text{MA}_{0.79}\text{Pb}_{1.27}\text{Br}_{0.3}$  thin films grown on  $\text{FTO}/\text{TiO}_2$  substrates. Same films were used in the UV-vis measurements portrayed in Figure 2 of the main text. Thickness was measured via profilometer, details of measurement device can be found in the Experimental section of the main text.

Table S3: FWHM and mean grain size (calculated from the histograms and Matlab line cut program) for the MA rich solution (0.16 FA : 0.79 MA). The FWHM comes from the XRD characterization, while the mean grain size comes from the analysis of the SEM images.

| Sample           | FWHM (degree) | Mean Grain Size (nm) |
|------------------|---------------|----------------------|
| 80° C - 30 min   | 0.114         | 312.5                |
| 80° C - 60 min   | 0.1199        | 329.63               |
| 80° C - 90 min   | 0.1387        | 316.67               |
| 80° C - 120 min  | 0.1139        | 877.78               |
| 150° C - 30 min  | 0.1432        | 253.39               |
| 150° C - 60 min  | 0.1474        | n/a                  |
| 150° C - 90 min  | 0.1405        | n/a                  |
| 150° C - 120 min | 0.1392        | n/a                  |

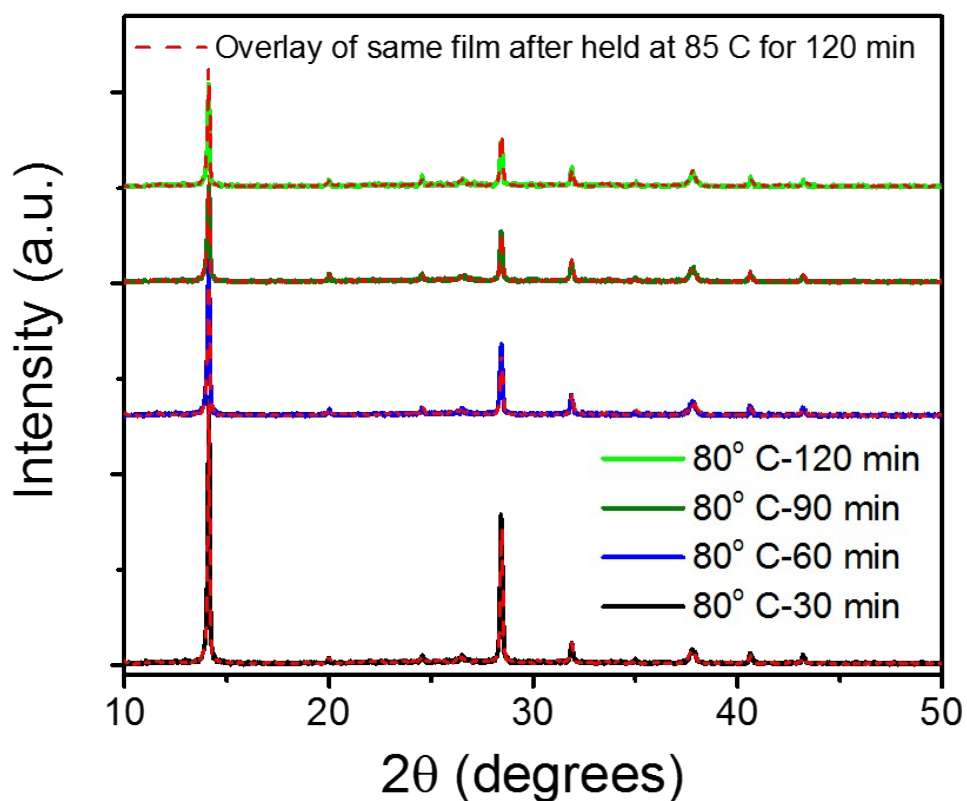

Figure S6: XRD results for the MA rich (0.16 FA:0.79 MA) films annealed at 80° C for 30, 60, 90, and 120 minutes. Once complete, films were measured, then placed back on hot plate for 2 hours at 85° C as an attempt to induce degradation. Once time had elapsed, films were removed and measured once again. The original XRD peak is shown in the corresponding solid color. The same film, once thermal degradation had been applied, is overlaid in dashed red.

#### References:

1. Sun, Y., et al., *Triple-cation mixed-halide perovskites: towards efficient, annealing-free and air-stable solar cells enabled by Pb (SCN) 2 additive*. Scientific reports, 2017. **7**(1): p. 1-7.
